# Supplementary material for: Global computational mutagenesis of domain structures associated with inherited eye disease
Source: PubMed Central journal article supplement (PMC6403380; doi:10.1038/s41598-019-39905-9), 2019-03-06
Supplement: 41598_2019_39905_MOESM1_ESM.pdf [file 41598_2019_39905_MOESM1_ESM.pdf]

**Supplemental Material.**

**Global computational mutagenesis of domain structures associated with inherited eye disease. Francisca Wood Ortiz, Yuri V. Sergeev**

**Supplemental Table S1. Templates used to model protein domains.** Each protein (column 1) is associated with up to three domain types (column2), for which the templates used to model each domain can be found in column 3. The templates shown can be accessed through RCSB.

| <b>Protein</b> | <b>Structural domains</b> | <b>Templates used</b>                                                                                                              |
|----------------|---------------------------|------------------------------------------------------------------------------------------------------------------------------------|
| EYS            | EGF-like                  | 2E26, 5VC1, 5KHX, 1EDM, 5VC1, 1PFX, 5KY0, 5LOV, 5KY3, 1EDM, 3R05, 3QCW, 4D0E, 4YLQ, 4RRX, 30JY, 3SH4, 3NT1                         |
|                | Laminin-G like            | 3PVE, 5IK4, 5IK8, 1PZ7, 3SH4, 5MC9, 2WJS                                                                                           |
| FBN1           | EGF-like                  | 2M74, 2WG3, 1UZK, 2W86, 4D03, 2JKH, 5LOV, 2BOU, 1IJQ, 4ZYU, IGL4, 5MWB, 3SOV, 4BDX, 4LOR,                                          |
|                | TB                        | 1UZK, 1APJ, 1UZP, 2W86,                                                                                                            |
| FBN2           | EGF-like                  | 2M74, 2YGO, 4BDX, 1EDM, 1UZK, 2W86, 5MS9, 2JKH, 2BOU, 1GL4, 3SOV, 1DX5, 1UZP, 1IJQ, 5LOV, 4D0E, 4XL1,                              |
|                | TB                        | 1UZK, 2W86, 5MS9, 1APJ, 1UZP,                                                                                                      |
| CFH            | Sushi                     | 2WII, 4K12, 4AYI 2V8E, 1OK3, 2XRB, 3J3R, 3R62, 3ZD1, 3R62, 3KZJ, 1OJV, 3KXV, 3ZD1                                                  |
| PCDH15         | Cadherin                  | 4APX, 5CYZ, 5T4N, 1ZXK, 3MVS, 5TPK, 4XHZ, 5KJ4, 5DZY, 4ZPM                                                                         |
| FAT1           | Cadherin                  | 5ERD, 5T4M, 4ZI9, 5TPK, 1ZXK, 4AQA, 2WCP, 4ZPM, 5SZQ, 3MVS, 4OY9, 5SZR, 5K8R, 5DZY, 5I8D, 5DZV, 4ZT1, 2O72, 4ZMY, 4ZI8, 4ZPQ, 5ERP |
|                | EGF-like                  | 5UK5, 5KXH, 5LOV, 5KY0, 1EDM                                                                                                       |
|                | Laminin-G like            | 3SH4, 5IK4, 2JD4, 3PVE, 5MC9                                                                                                       |
| FAT4           | Cadherin                  | 5K8R, 4ZPM, 4ZI9, 4ZI8, 4ZPQ, IZKX, 5DZV, 5SZR, 3MVS, 5I8D, 5DZY, 5DZX, 5DZW, 5TPK, 2WCP, 4ZT1, 4ZMY, 4ZPL, 5SZQ, 4OY9, 2O72       |
|                | EGF-like                  | 5KY0, 5LOV, 5KY4, 5KXH                                                                                                             |
|                | Laminin-G like            | 2WJS, 5MC9, 3SH4, 5IK4, 2H0B, 5IK8, 2JD4, 1OKQ                                                                                     |
| ROBO3          | Ig-like C2-type           | 2V9R, 3PUC, 2VRA, 4C4K, 2YD1, 2RJM, 5NOI, 3KNB, 2RIK, 2A38, 2YD1                                                                   |
|                | Fibronectin type III      | 1UEM, 4YFE, 4U3H, 4HLJ, 5E7L, 4N5U                                                                                                 |
| CDH23          | Cadherin                  | 4AQE, 4AQA, 5DZV, 5DZY, 5K8R, 5I8D, 5SZR, 5DZX, 5TPK, 5SZQ, 4ZI8, 4ZPQ, 4ZI9, 4ZPM, 4OY9, 4ZT1, 3PPE, 5CYX, 1ZXK, 2WCP, 3MVS, 4ZMY |

**Supplemental Table S2. Domain p-values produced in internal control for 296 domains studied in this work.** Each row contains a single domain identified by the protein name and domain range, as well as its associated p-value.

| <b>Protein</b> | <b>Domain</b> | <b>P-value</b> | <b>Protein</b> | <b>Domain</b> | <b>P-value</b> |
|----------------|---------------|----------------|----------------|---------------|----------------|
| CDH23          | 108-215       | 1.1181E-03     | CFH            | 19-82         | 2.06E-02       |
| CDH23          | 216-328       | 1.2422E-03     | CFH            | 83-143        | 7.72E-03       |
| CDH23          | 329-440       | 7.2985E-03     | CFH            | 144-207       | 2.18E-05       |
| CDH23          | 441-546       | 3.5300E-06     | CFH            | 208-264       | 9.57E-04       |
| CDH23          | 547-650       | 6.9500E-06     | CFH            | 265-322       | 8.19E-05       |
| FBN1           | 81-112        | 5.0667E-02     | CFH            | 324-386       | 3.45E-03       |
| FBN1           | 115-146       | 1.3007E-02     | CFH            | 387-444       | 1.12E-03       |
| FBN1           | 147-178       | 1.4746E-02     | CFH            | 446-507       | 5.85E-05       |
| FBN1           | 184-236       | 9.5051E-01     | CFH            | 515-566       | 3.36E-03       |
| FBN1           | 246-287       | 2.2768E-03     | CFH            | 567-625       | 6.25E-07       |
| FBN1           | 288-329       | 1.1134E-01     | CFH            | 628-686       | 8.05E-03       |
| FBN1           | 334-389       | 6.3071E-04     | CFH            | 689-746       | 5.76E-05       |
| FBN1           | 449-489       | 2.8309E-03     | CFH            | 751-805       | 5.23E-06       |
| FBN1           | 490-529       | 4.3871E-01     | CFH            | 809-866       | 1.38E-01       |
| FBN1           | 530-571       | 1.4864E-02     | CFH            | 868-928       | 1.96E-03       |
| FBN1           | 572-612       | 5.7299E-01     | CFH            | 929-986       | 3.40E-03       |
| FBN1           | 613-653       | 2.0651E-01     | CFH            | 987-1045      | 6.45E-04       |
| FBN1           | 659-711       | 7.4859E-01     | CFH            | 1046-1104     | 7.45E-04       |
| FBN1           | 723-764       | 6.0900E-05     | CFH            | 1107-1165     | 1.81E-05       |
| FBN1           | 765-806       | 2.9600E-05     | CFH            | 1170-1230     | 1.02E-02       |
| FBN1           | 807-846       | 2.2885E-03     | FBN2           | 111-142       | 3.05E-02       |
| FBN1           | 851-902       | 4.3714E-02     | FBN2           | 145-176       | 9.83E-03       |
| FBN1           | 910-951       | 4.2805E-04     | FBN2           | 176-208       | 1.30E-02       |
| FBN1           | 956-1008      | 2.8755E-03     | FBN2           | 214-266       | 3.00E-02       |
| FBN1           | 1028-1069     | 3.9214E-04     | FBN2           | 276-317       | 1.88E-02       |
| FBN1           | 1070-1112     | 4.7494E-03     | FBN2           | 318-359       | 7.12E-02       |
| FBN1           | 1113-1154     | 5.8231E-02     | FBN2           | 364-417       | 1.51E-03       |
| FBN1           | 1155-1196     | 5.9325E-01     | FBN2           | 494-534       | 9.43E-02       |
| FBN1           | 1197-1237     | 9.6996E-04     | FBN2           | 535-574       | 2.55E-01       |
| FBN1           | 1238-1279     | 3.0613E-04     | FBN2           | 575-616       | 5.13E-02       |
| FBN1           | 1280-1321     | 1.7791E-02     | FBN2           | 617-657       | 1.01E-04       |
| FBN1           | 1322-1362     | 7.0839E-01     | FBN2           | 658-698       | 1.66E-02       |
| FBN1           | 1363-1403     | 1.2938E-03     | FBN2           | 704-756       | 3.26E-04       |

|      |           |            |      |           |          |
|------|-----------|------------|------|-----------|----------|
| FBN1 | 1404-1445 | 1.0922E-02 | FBN2 | 768-809   | 2.44E-03 |
| FBN1 | 1446-1486 | 8.0161E-02 | FBN2 | 810-851   | 4.98E-02 |
| FBN1 | 1487-1527 | 3.3544E-03 | FBN2 | 852-891   | 1.64E-02 |
| FBN1 | 1532-1589 | 7.0800E-05 | FBN2 | 896-947   | 3.29E-03 |
| FBN1 | 1606-1647 | 5.3226E-02 | FBN2 | 955-996   | 2.63E-03 |
| FBN1 | 1648-1688 | 4.3107E-02 | FBN2 | 1001-1052 | 1.26E-03 |
| FBN1 | 1693-1748 | 1.4139E-02 | FBN2 | 1073-1114 | 1.45E-02 |
| FBN1 | 1766-1807 | 8.6944E-03 | FBN2 | 1115-1157 | 1.09E-02 |
| FBN1 | 1808-1848 | 9.2035E-04 | FBN2 | 1158-1199 | 7.37E-01 |
| FBN1 | 1849-1890 | 2.6362E-03 | FBN2 | 1200-1241 | 2.99E-02 |
| FBN1 | 1891-1929 | 2.9929E-02 | FBN2 | 1242-1282 | 3.25E-04 |
| FBN1 | 1930-1972 | 1.6640E-02 | FBN2 | 1283-1324 | 6.22E-05 |
| FBN1 | 1973-2012 | 2.1241E-03 | FBN2 | 1325-1366 | 2.58E-03 |
| FBN1 | 2013-2054 | 2.4704E-04 | FBN2 | 1367-1407 | 1.48E-02 |
| FBN1 | 2059-2111 | 1.8290E-02 | FBN2 | 1408-1448 | 6.00E-02 |
| FBN1 | 2127-2165 | 7.1475E-01 | FBN2 | 1449-1490 | 4.72E-03 |
| FBN1 | 2166-2205 | 1.1257E-02 | FBN2 | 1491-1531 | 1.92E-02 |
| FBN1 | 2206-2246 | 4.1755E-03 | FBN2 | 1532-1572 | 6.66E-03 |
| FBN1 | 2247-2290 | 9.8513E-01 | FBN2 | 1577-1633 | 6.83E-02 |
| FBN1 | 2291-2332 | 1.7958E-03 | FBN2 | 1650-1691 | 2.29E-02 |
| FBN1 | 2337-2390 | 3.1966E-02 | FBN2 | 1692-1733 | 5.24E-03 |
| FBN1 | 2402-2443 | 2.5531E-02 | FBN2 | 1738-1791 | 3.74E-03 |
| FBN1 | 2444-2484 | 6.0512E-03 | FBN2 | 1808-1849 | 3.19E-03 |
| FBN1 | 2485-2523 | 1.0709E-02 | FBN2 | 1850-1891 | 1.03E-02 |
| FBN1 | 2524-2566 | 2.2327E-02 | FBN2 | 1892-1933 | 5.68E-03 |
| FBN1 | 2567-2606 | 8.8785E-04 | FBN2 | 1934-1972 | 2.20E-03 |
| FBN1 | 2607-2647 | 5.2547E-02 | FBN2 | 1973-2015 | 6.39E-02 |
| FBN1 | 2648-2687 | 4.7080E-03 | FBN2 | 2016-2055 | 1.36E-03 |
| EYS  | 170-212   | 1.3408E-01 | FBN2 | 2056-2097 | 2.03E-02 |
| EYS  | 213-254   | 2.6126E-04 | FBN2 | 2102-2155 | 5.92E-04 |
| EYS  | 256-292   | 1.4534E-01 | FBN2 | 2171-2212 | 5.38E-04 |
| EYS  | 332-368   | 5.4188E-04 | FBN2 | 2213-2252 | 2.72E-02 |
| EYS  | 370-406   | 1.2068E-03 | FBN2 | 2253-2293 | 4.97E-05 |
| EYS  | 567-602   | 2.2651E-01 | FBN2 | 2294-2337 | 6.16E-02 |
| EYS  | 643-679   | 4.3519E-02 | FBN2 | 2338-2379 | 2.32E-02 |
| EYS  | 681-720   | 2.7479E-02 | FBN2 | 2384-2437 | 3.61E-02 |
| EYS  | 733-769   | 1.6433E-02 | FBN2 | 2449-2490 | 1.49E-02 |
| EYS  | 771-807   | 1.9195E-04 | FBN2 | 2491-2531 | 4.43E-03 |

|      |           |            |       |           |          |
|------|-----------|------------|-------|-----------|----------|
| EYS  | 809-847   | 6.1003E-04 | FBN2  | 2532-2570 | 2.56E-02 |
| EYS  | 849-888   | 6.6133E-04 | FBN2  | 2571-2613 | 4.38E-02 |
| EYS  | 890-926   | 5.4300E-05 | FBN2  | 2614-2653 | 3.84E-03 |
| EYS  | 928-964   | 1.0919E-01 | FBN2  | 2654-2694 | 9.68E-02 |
| EYS  | 966-1002  | 1.0758E-01 | FBN2  | 2695-2734 | 9.16E-01 |
| EYS  | 1004-1040 | 2.8976E-01 | CDH23 | 34-132    | 1.09E-04 |
| EYS  | 1042-1077 | 5.8944E-02 | CDH23 | 133-236   | 1.32E-04 |
| EYS  | 1079-1115 | 6.7556E-03 | CDH23 | 237-348   | 2.72E-03 |
| EYS  | 1117-1159 | 2.3487E-01 | CDH23 | 349-460   | 2.88E-03 |
| EYS  | 1161-1197 | 4.8390E-02 | CDH23 | 461-561   | 3.57E-06 |
| EYS  | 1883-2063 | 3.2287E-01 | CDH23 | 562-671   | 4.12E-03 |
| EYS  | 2099-2140 | 1.0688E-02 | CDH23 | 672-784   | 1.11E-02 |
| EYS  | 2145-2339 | 5.5125E-02 | CDH23 | 779-890   | 3.89E-03 |
| EYS  | 2335-2368 | 7.4280E-01 | CDH23 | 891-995   | 4.47E-03 |
| EYS  | 2371-2408 | 1.9097E-02 | CDH23 | 996-1102  | 7.02E-02 |
| EYS  | 2419-2609 | 1.3375E-02 | CDH23 | 1103-1208 | 7.00E-02 |
| EYS  | 2610-2646 | 2.0400E-03 | CDH23 | 1210-1313 | 1.86E-02 |
| EYS  | 2648-2689 | 1.3930E-01 | CDH23 | 1314-1418 | 8.72E-05 |
| EYS  | 2717-2895 | 3.4800E-06 | CDH23 | 1420-1527 | 1.55E-04 |
| EYS  | 2896-2932 | 7.4604E-03 | CDH23 | 1529-1634 | 1.11E-04 |
| EYS  | 2933-2970 | 3.5792E-02 | CDH23 | 1635-1744 | 1.82E-02 |
| EYS  | 2975-3165 | 3.3400E-05 | CDH23 | 1745-1851 | 1.54E-01 |
| FAT4 | 43-135    | 3.3956E-02 | CDH23 | 1852-1959 | 1.69E-03 |
| FAT4 | 136-250   | 4.7129E-02 | CDH23 | 1960-2069 | 2.99E-05 |
| FAT4 | 251-353   | 2.6184E-04 | CDH23 | 2070-2174 | 1.71E-05 |
| FAT4 | 359-475   | 2.3010E-03 | CDH23 | 2175-2293 | 1.87E-02 |
| FAT4 | 476-582   | 1.8940E-02 | CDH23 | 2297-2402 | 8.38E-01 |
| FAT4 | 584-689   | 5.3992E-03 | CDH23 | 2403-2509 | 8.50E-05 |
| FAT4 | 690-793   | 2.3112E-04 | CDH23 | 2510-2611 | 2.23E-03 |
| FAT4 | 794-893   | 3.0042E-03 | CDH23 | 2614-2722 | 6.54E-04 |
| FAT4 | 894-996   | 1.1596E-02 | CDH23 | 2729-2846 | 1.81E-01 |
| FAT4 | 997-1100  | 2.4141E-01 | CDH23 | 2847-2975 | 5.18E-04 |
| FAT4 | 1101-1210 | 1.2917E-01 | ROBO3 | 64-160    | 2.22E-02 |
| FAT4 | 1211-1315 | 2.4189E-04 | ROBO3 | 166-253   | 6.99E-01 |
| FAT4 | 1316-1420 | 1.0001E-01 | ROBO3 | 258-342   | 4.12E-05 |
| FAT4 | 1421-1529 | 9.6130E-03 | ROBO3 | 347-440   | 6.45E-09 |
| FAT4 | 1529-1629 | 3.1404E-01 | ROBO3 | 450-531   | 2.48E-03 |
| FAT4 | 1630-1740 | 2.7700E-07 | ROBO3 | 558-652   | 1.24E-03 |

|        |           |            |       |           |          |
|--------|-----------|------------|-------|-----------|----------|
| FAT4   | 1741-1841 | 1.6066E-02 | ROBO3 | 671-766   | 3.02E-05 |
| FAT4   | 1842-1944 | 5.3334E-03 | ROBO3 | 771-869   | 6.48E-04 |
| FAT4   | 1945-2051 | 8.0023E-02 | FAT1  | 35-149    | 2.47E-03 |
| FAT4   | 2051-2154 | 1.3064E-02 | FAT1  | 150-257   | 3.76E-04 |
| FAT4   | 2155-2259 | 3.0624E-04 | FAT1  | 368-463   | 2.82E-02 |
| FAT4   | 2260-2364 | 3.8565E-02 | FAT1  | 464-569   | 4.08E-07 |
| FAT4   | 2365-2466 | 1.3800E-05 | FAT1  | 570-673   | 1.89E-01 |
| FAT4   | 2467-2567 | 1.5100E-03 | FAT1  | 718-822   | 9.28E-04 |
| FAT4   | 2568-2669 | 6.7800E-06 | FAT1  | 823-927   | 2.16E-02 |
| FAT4   | 2670-2773 | 8.0900E-05 | FAT1  | 928-1034  | 3.63E-03 |
| FAT4   | 2773-2872 | 3.6490E-03 | FAT1  | 1035-1139 | 6.18E-05 |
| FAT4   | 2873-2983 | 1.1980E-04 | FAT1  | 1140-1245 | 5.99E-04 |
| FAT4   | 2984-3089 | 1.9959E-02 | FAT1  | 1246-1357 | 1.31E-02 |
| FAT4   | 3090-3194 | 5.4743E-04 | FAT1  | 1359-1456 | 8.48E-02 |
| FAT4   | 3195-3298 | 3.8200E-05 | FAT1  | 1457-1562 | 3.99E-03 |
| FAT4   | 3299-3404 | 2.9400E-05 | FAT1  | 1563-1667 | 3.92E-04 |
| FAT4   | 3405-3510 | 5.1888E-04 | FAT1  | 1668-1765 | 8.91E-03 |
| FAT4   | 3509-3620 | 2.0945E-03 | FAT1  | 1766-1879 | 4.12E-01 |
| FAT4   | 3802-3860 | 1.1606E-01 | FAT1  | 1880-1979 | 6.92E-02 |
| FAT4   | 3862-3898 | 5.6624E-03 | FAT1  | 1980-2081 | 1.60E-04 |
| FAT4   | 3900-3936 | 6.5231E-03 | FAT1  | 2082-2182 | 2.52E-03 |
| FAT4   | 3938-3974 | 7.1505E-02 | FAT1  | 2183-2283 | 3.37E-02 |
| FAT4   | 3975-4159 | 7.8190E-04 | FAT1  | 2284-2390 | 1.95E-01 |
| FAT4   | 4162-4198 | 1.7915E-03 | FAT1  | 2391-2492 | 2.21E-01 |
| FAT4   | 4217-4398 | 1.9200E-05 | FAT1  | 2493-2596 | 5.42E-02 |
| FAT4   | 4426-4463 | 3.5930E-03 | FAT1  | 2597-2703 | 2.21E-04 |
| Q96QU1 | 40-147    | 8.4071E-04 | FAT1  | 2704-2809 | 6.93E-02 |
| Q96QU1 | 148-265   | 1.7600E-05 | FAT1  | 2810-2918 | 8.87E-04 |
| Q96QU1 | 278-395   | 1.6049E-04 | FAT1  | 2919-3023 | 5.81E-02 |
| Q96QU1 | 396-509   | 4.1400E-05 | FAT1  | 3024-3125 | 4.80E-01 |
| Q96QU1 | 510-616   | 1.1032E-01 | FAT1  | 3126-3230 | 1.96E-04 |
| Q96QU1 | 617-717   | 1.0606E-02 | FAT1  | 3231-3335 | 2.56E-06 |
| Q96QU1 | 719-819   | 8.7696E-03 | FAT1  | 3336-3440 | 4.31E-05 |
| Q96QU1 | 820-926   | 8.1110E-03 | FAT1  | 3441-3545 | 1.50E-02 |
| Q96QU1 | 927-1035  | 1.5777E-01 | FAT1  | 3546-3647 | 1.80E-03 |
| Q96QU1 | 1037-1144 | 6.7598E-01 | FAT1  | 3790-3827 | 9.18E-01 |
| Q96QU1 | 1145-1259 | 1.9200E-01 | FAT1  | 3829-4009 | 9.91E-04 |
|        |           |            | FAT1  | 4013-4050 | 6.43E-02 |

|      |           |          |
|------|-----------|----------|
| FAT1 | 4052-4088 | 7.03E-03 |
| FAT1 | 4089-4125 | 1.26E-03 |
| FAT1 | 4127-4163 | 3.80E-01 |

**Supplemental Table S3. Conservation of sequence of 7 domain sets studied.** Each domain type (column 1) identifies the number of domains and residues aligned. The third and fourth columns identify the total number of residues which were aligned in the consensus (conserved) and the percentage of these which is identified as critical. The fifth and sixth column identify the total number of residues which were not aligned in the consensus (non-conserved) and the percentage of these which is identified as critical. On average, 52% of all aligned, conserved residues were described as critical while only 34% of non-conserved residues were described as critical.

| <b>Domain</b>        | <b>Number of domains aligned</b> | <b>Total number of residues aligned</b> | <b>Number of conserved residues</b> | <b>% of critical conserved residues</b> | <b>Number of non-conserved residues</b> | <b>% of critical non-conserved residues</b> |
|----------------------|----------------------------------|-----------------------------------------|-------------------------------------|-----------------------------------------|-----------------------------------------|---------------------------------------------|
| EGF-like             | 132                              | 5324                                    | 2112                                | 41%                                     | 3212                                    | 25%                                         |
| TB                   | 9                                | 983                                     | 540                                 | 45%                                     | 443                                     | 23%                                         |
| Cadherin             | 105                              | 11785                                   | 5060                                | 49%                                     | 6725                                    | 39%                                         |
| Sushi                | 20                               | 1187                                    | 460                                 | 57%                                     | 727                                     | 43%                                         |
| Laminin              | 8                                | 1386                                    | 632                                 | 56%                                     | 754                                     | 32%                                         |
| Fibronectin type-III | 3                                | 290                                     | 165                                 | 62%                                     | 125                                     | 30%                                         |
| Ig-like C2-type      | 5                                | 449                                     | 295                                 | 56%                                     | 154                                     | 47%                                         |
| Average              |                                  |                                         |                                     | 52%                                     |                                         | 34%                                         |

**Supplemental Table S4. Summary of alignment consensus for each domain set.** Each domain type can be found in column 1, and for each domain set, the number and types of identically-conserved residues can be found in column 2. The percentage of identically-conserved residues which were discovered to be critical residues is found in column 3. In column 4, the number and types of similarly-conserved residue groups can be found, as well as the corresponding percentage of similarly-conserved residues which were discovered to be critical residues, which can be found in column 5. Columns 6, 7 and 8 contain the average foldabilities of identically-conserved, similarly-conserved, and non-conserved residues. On average, 51% of identically-conserved residues, and 52% of similarly-conserved residues were identified as critical. The average foldabilities of identically-conserved and similarly-conserved residues were 10.04 and 10.36, respectively. The average foldability of non-conserved residues was lower, at 9.10 foldability.

| Domain    | Frequencies of identically-conserved residues                          | % critical identically-conserved residues | Frequencies of similarly-conserved residue groups                                        | % critical similarly-conserved residues | Average foldability identically-conserved residues | Average foldability similarly-conserved residues | Average foldability non-conserved residues |
|-----------|------------------------------------------------------------------------|-------------------------------------------|------------------------------------------------------------------------------------------|-----------------------------------------|----------------------------------------------------|--------------------------------------------------|--------------------------------------------|
| EGF-like  | 5 Cysteine                                                             | 40%                                       | 7 small (s)<br>2 aromatic (@)<br>1 polar (p)<br>1 tiny (t)                               | 40%                                     | 8.8                                                | 8.73                                             | 8.72                                       |
| Laminin-G | 4 Glycine<br>2 Cysteine<br>1 Serine<br>1 Phenylalanine<br>1 Isoleucine | 56%                                       | 24 hydrophobic (h)<br>18 polar (p)<br>13 small (s)<br>10 aliphatic (l)<br>4 aromatic (@) | 57%                                     | 10.41                                              | 11.19                                            | 9.55                                       |
| Cadherin  | 2 Glutamic acid<br>2 Phenylalanine<br>1 Aspartic acid<br>1 Tyrosine    | 41%                                       | 13 aliphatic (l)<br>10 small (s)<br>5 hydrophobic (h)<br>4 polar (p)                     | 48%                                     | 9.02                                               | 9.84                                             | 8.39                                       |



|                         |                                                                                                  |     |                                                                                                                                     |     |       |       |       |
|-------------------------|--------------------------------------------------------------------------------------------------|-----|-------------------------------------------------------------------------------------------------------------------------------------|-----|-------|-------|-------|
|                         | 1 Glycine<br>1 Proline                                                                           |     | 3 charged (c)<br>1 aromatic (@)                                                                                                     |     |       |       |       |
| TB                      | 7 Cysteine<br>2 Glycine<br>1 Aspartic acid<br>1 Proline<br>1 Lysine                              | 47% | 4 small (s)<br>3 polar (p)<br>3 tiny (t)<br>2 aromatic (@)<br>1 bulky (b)<br>1 aliphatic (l)                                        | 43% | 9.75  | 9.44  | 7.58  |
| Sushi                   | 6 Cysteine<br>1 Tryptophan<br>1 Proline                                                          | 65% | 7 polar (p)<br>4 small (s)<br>3 aromatic (@)<br>3 hydrophobic (h)                                                                   | 55% | 11.85 | 11.01 | 9.31  |
| Ig-like<br>C2-type      | 5 Glycine<br>3 Proline<br>2 Cysteine<br>1 Alanine<br>1 Aspartic acid<br>1 Lysine<br>1 Tryptophan | 43% | 13 hydrophobic (h)<br>11 polar (p)<br>8 small (s)<br>4 aliphatic (l)<br>3 tiny (t)<br>3 charged (c)<br>2 bulky (b)                  | 60% | 9.27  | 11.05 | 10.37 |
| Fibronectin<br>type-III | 2 Glycine<br>1 Tryptophan<br>1 Leucine<br>1 Proline<br>1 Valine<br>1 Alanine<br>1 serine         | 63% | 15 small (s)<br>9 hydrophobic (h)<br>8 polar (p)<br>7 aliphatic (l)<br>3 alcohol (o)<br>2 bulky (b)<br>2 tiny (t)<br>1 aromatic (@) | 61% | 11.17 | 11.25 | 9.77  |

|         |  |     |  |     |       |       |     |
|---------|--|-----|--|-----|-------|-------|-----|
| Average |  | 51% |  | 52% | 10.04 | 10.36 | 9.1 |
|---------|--|-----|--|-----|-------|-------|-----|

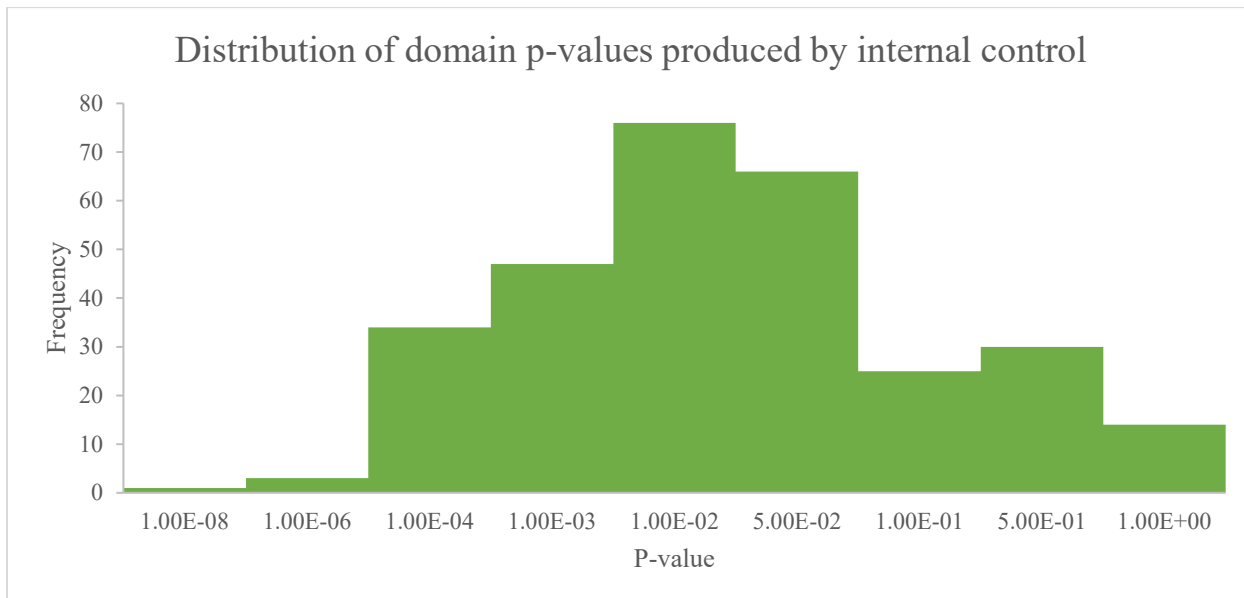

**Supplemental Figure S1. Histogram showing the distribution of domain p-values produced by internal control.** P-value bins range from magnitudes of  $1.00 \times 10^{-8}$  to  $1.00 \times 10^1$ . The distribution shows more than 75% of produced p-values are 0.01 or smaller, and most domain models have p-values centered around  $1.00 \times 10^{-2}$ .

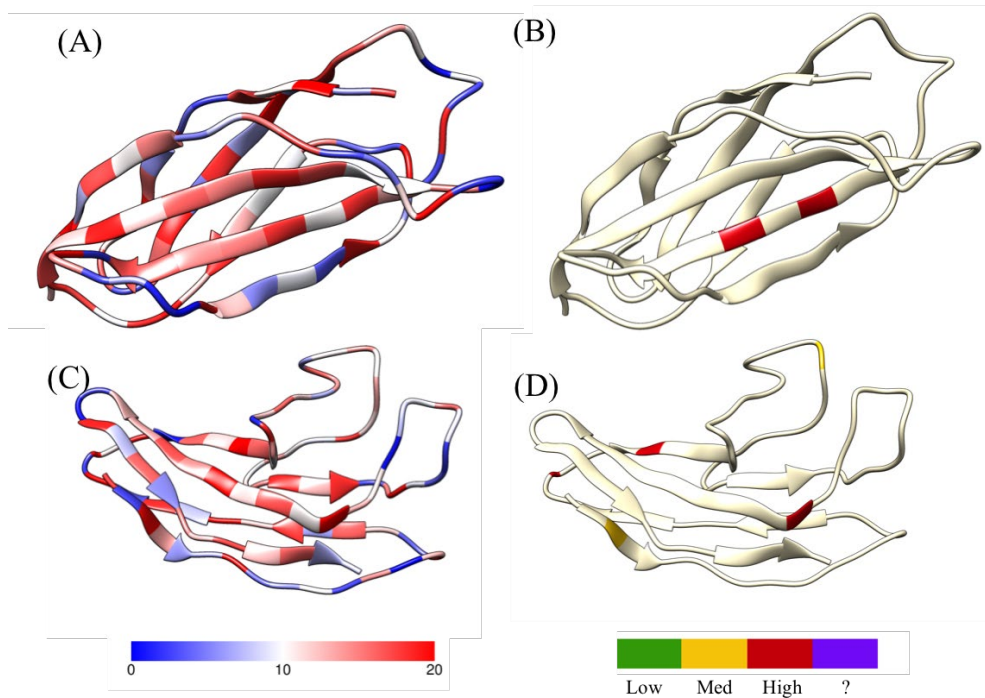

**Supplemental Figure S2. Fibronectin type-III and Ig-like C2-type domains of ROBO3 labeled by foldability and HGMD mutations** Fibronectin type-III domain (A and B) and Ig-like C2-type domain (C and D) sample of ROBO3 protein colored by foldability (left) and HGMD disease-causing mutations (right). The foldability scale ranges from 0 to 20, with low-foldability residues shown in blue and high-foldability residues shown in red. Tan residues on the right structure are not associated with any disease-causing mutations, while green, yellow, and red residues correspond to low, medium, and high-destabilization mutations. Mutations colored in purple do not have an associated unfolding propensity. 78% of severe mutations of ROBO3 occurred in high-foldability residues.

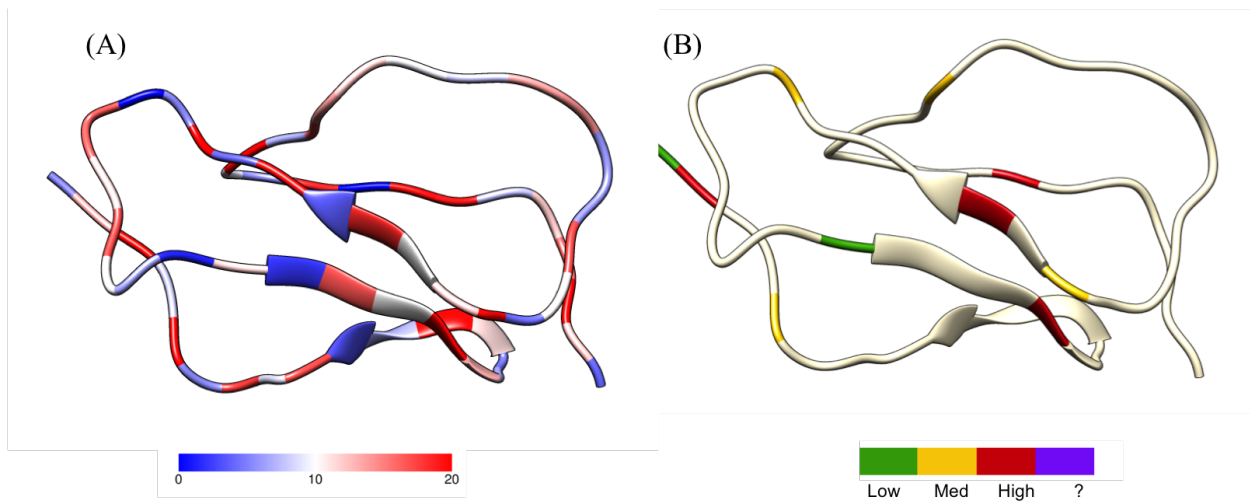

**Supplemental Figure S3. Sushi domain of CFH labeled by foldability and HGMD mutations. Sushi domain (A and B) sample of CFH protein colored by foldability (left) and HGMD disease-causing mutations (right).** The foldability scale ranges from 0 to 20, with low-foldability residues shown in blue and high-foldability residues shown in red. Tan residues on the right structure are not associated with any disease-causing mutations, while green, yellow, and red residues correspond to low, medium, and high-destabilization mutations. Mutations colored in purple do not have an associated unfolding propensity. 91% of severe mutations of CFH occur in high-foldability residues.

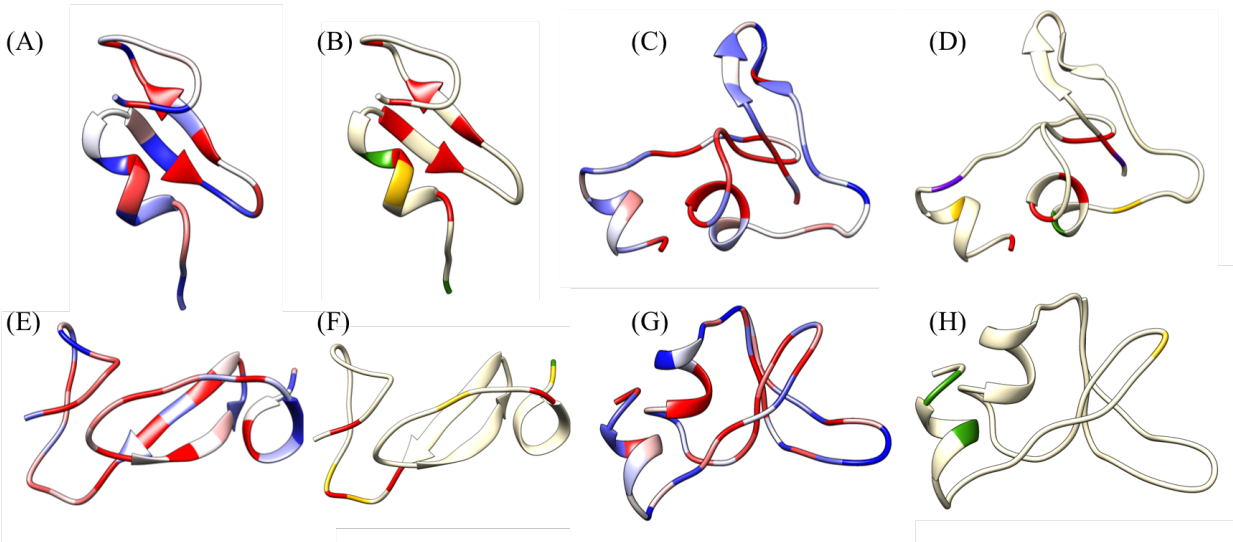

**Supplemental Figure S4. EGF-like and TB domains of FBN1 and FBN2 labeled by foldability and HGMD mutations.** EGF-like domains (A, B, E, and F) and TB domains (C, D, G, and H) samples of FBN1 (top) and FBN2 (bottom) proteins colored by foldability (A, C, E, and G) and HGMD disease-causing mutations (B, D, F, and H). The foldability scale ranges from 0 to 20, with low-foldability residues shown in blue and high-foldability residues shown in red. Tan residues on the right structure are not associated with any disease-causing mutations, while green, yellow, and red residues correspond to low, medium, and high-destabilization mutations. Mutations colored in purple do not have an associated unfolding propensity. 92% of FBN1 severe mutations occurred in residues which were considered critical. 67% of severe mutations of FBN2 occur in high-foldability residues.

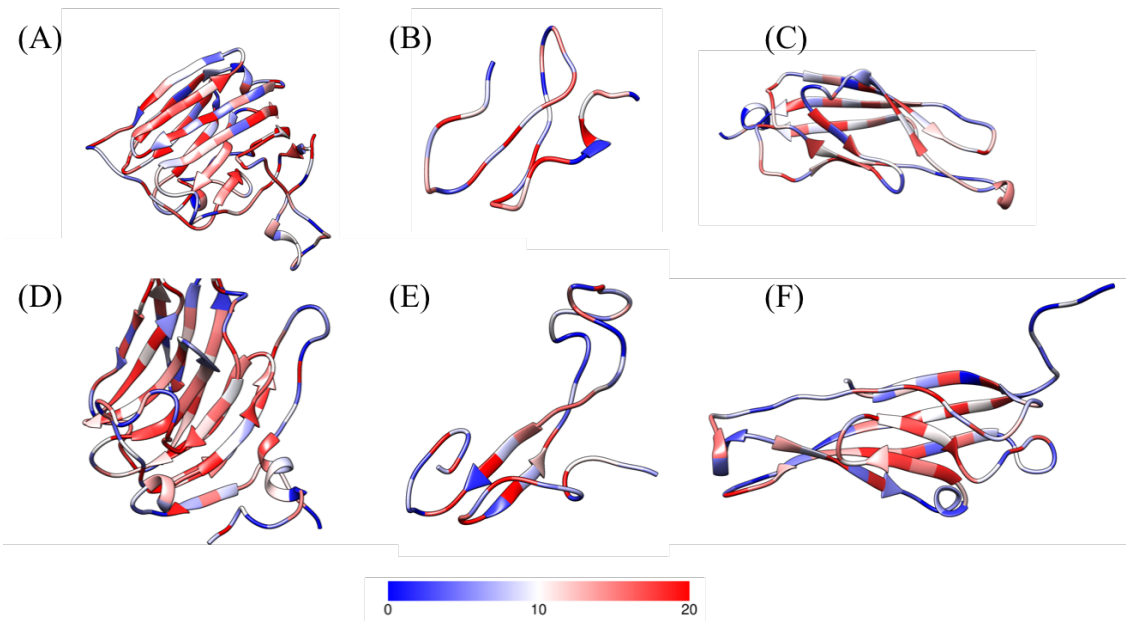

**Supplemental Figure S5. Laminin-G, EGF-like, and cadherin domains of FAT1 and FAT4 labeled by foldability.** Laminin-G domains (A and D), EGF-like domains (B and E), and cadherin domains (C and F) samples of FAT1(top) and FAT4 (bottom) proteins colored by foldability. The foldability scale ranges from 0 to 20, with low-foldability residues shown in blue and high-foldability residues shown in red. 75% of FAT1 severe mutations occurred in residues which were considered critical. 100% of severe mutations of FAT4 occur in high-foldability residues.

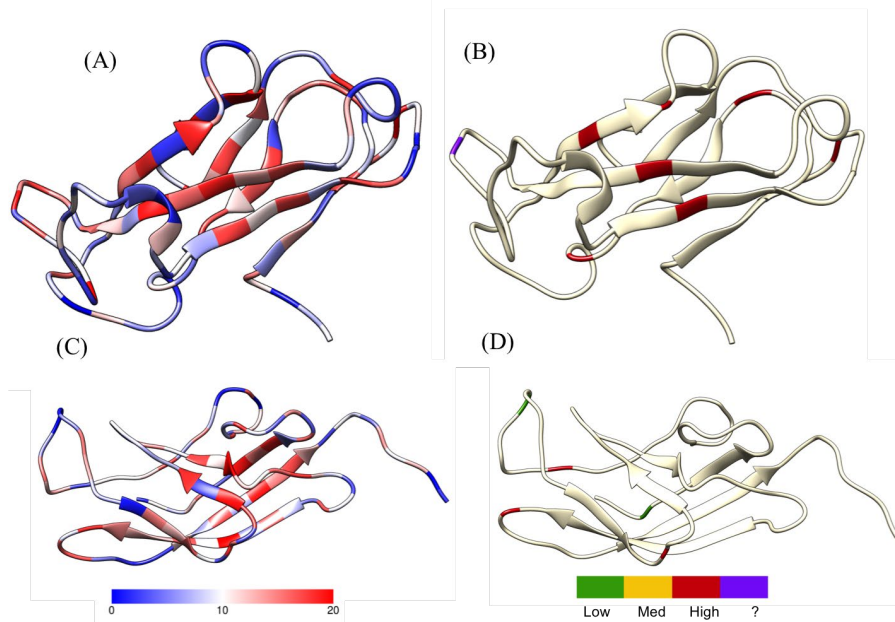

**Supplemental Figure S6. Cadherin domains of CDH23 and PCDH15 labeled by foldability and HGMD mutations.** Cadherin domains of CDH23(top) and PCDH15 (bottom) proteins colored by foldability (left) and HGMD disease-causing mutations (right). The foldability scale ranges from 0 to 20, with low-foldability residues shown in blue and high-foldability residues shown in red. Tan residues on the right structure are not associated with any disease-causing mutations, while green, yellow, and red residues correspond to low, medium, and high-destabilization mutations. Mutations colored in purple do not have an associated unfolding propensity. 55% of CDH23 severe mutations occurred in residues which were considered critical. 100% of severe mutations of PCDH15 occur in high-foldability residues.

**Consensus amino acid symbols:**

**conserved** amino acid residues: **bold and uppercase** letters (such as **G**);

**aliphatic** residues (**I, V, L**): *l*

**aromatic** residues (**Y, H, W, F**): *@*

**hydrophobic** residues (**W, F, Y, M, L, I, V, A, C, T, H**): *h*

**alcohol** residues (**S, T**): *o*

**polar** residues (**D, E, H, K, N, Q, R, S, T**): *p*

**tiny** residues (**A, G, C, S**): *t*

**small** residues (**A, G, C, S, V, N, D, T, P**): *s*

**bulky** residues (**E, F, I, K, L, M, Q, R, W, Y**): *b*

**positively charged** residues (**K, R, H**): *+*

**negatively charged** residues (**D, E**): *-*

**charged** (**D, E, K, R, H**): *c*

**Supplemental Figure S7. Residue groups specified in alignment consensus.** The key above identifies symbols for each amino acid group specified in the alignment consensus and specifies which amino acid residues are included in each group.
